# Supplementary material
Source: PubMed Central journal article supplement (PMC4507309)
Supplement: Supp_Table1.pdf [file Supp_Table1.pdf]

## Supplementary Data

SUPPLEMENTARY TABLE S1. LIST OF PATHOGENS RESPONSIBLE FOR EID EVENTS (JONES ET AL. 2008), THE UNDERLYING DRIVER THOUGHT TO BE RESPONSIBLE FOR THEIR EMERGENCE, AND THE TRANSMISSION PATHWAYS CITED MOST OFTEN AS RESPONSIBLE FOR THEIR SPILLOVER INTO PEOPLE, ALONG WITH THE PROBABILITY AND WEIGHTING WE ASSIGNED TO EACH PATHWAY IN OUR ANALYSIS

| <i>Pathogen/disease</i>            | <i>Probability</i> | <i>Weights</i> | <i>Driver</i>                     | <i>Transmission routes</i>         |
|------------------------------------|--------------------|----------------|-----------------------------------|------------------------------------|
| Alkhurma virus                     | Likely             | 1              | International travel and commerce | Vector-borne                       |
| Andes                              | Likely             | 1              | Land-use change                   | Airborne transmission              |
| <i>Angiostrongylus cantonensis</i> | Likely             | 1              | International travel and commerce | Oral transmission                  |
| <i>Anisakis simplex</i>            | Likely             | 1              | Human demographics and behavior   | Oral transmission                  |
| Australian bat lyssavirus          | Likely             | 1              | Land-use change                   | Direct animal contact              |
| <i>Babesia divergens</i>           | Likely             | 1              | Land-use change                   | Vector-borne                       |
| <i>Babesia microti</i>             | Likely             | 1              | Land-use change                   | Vector-borne                       |
| <i>Babesia microti</i> -like       | Likely             | 1              | Land-use change                   | Vector-borne                       |
| <i>Bacillus anthracis</i>          | Likely             | 0.9            | Medical industry change           | Direct animal contact              |
| <i>Bacillus anthracis</i>          | Less likely        | 0.05           | Medical industry change           | Airborne transmission              |
| <i>Bacillus anthracis</i>          | Less likely        | 0.05           | Medical industry change           | Oral transmission                  |
| Banna                              | Likely             | 1              | Medical industry change           | Vector-borne                       |
| Barmah forest                      | Likely             | 1              | International travel and commerce | Vector-borne                       |
| <i>Borrelia burgdorferi</i>        | Likely             | 1              | Land-use change                   | Vector-borne                       |
| <i>Brucella melitensis</i>         | Likely             | 0.45           | Agricultural industry change      | Direct animal contact              |
| <i>Brucella melitensis</i>         | Less likely        | 0.1            | Agricultural industry change      | Airborne transmission              |
| <i>Brucella melitensis</i>         | Likely             | 0.45           | Agricultural industry change      | Oral transmission                  |
| <i>Burkholderia pseudomallei</i>   | Less likely        | 0.1            | War and famine                    | Direct animal contact              |
| <i>Burkholderia pseudomallei</i>   | Likely             | 0.3            | War and famine                    | Airborne transmission              |
| <i>Burkholderia pseudomallei</i>   | Likely             | 0.3            | War and famine                    | Oral transmission                  |
| <i>Burkholderia pseudomallei</i>   | Likely             | 0.3            | War and famine                    | Contaminated environment or fomite |
| Bwamba                             | Likely             | 1              | Land-use change                   | Vector-borne                       |
| California encephalitis            | Likely             | 1              | Land-use change                   | Vector-borne                       |
| <i>Campylobacter jejuni</i>        | Less likely        | 0.05           | Agricultural industry change      | Direct animal contact              |
| <i>Campylobacter jejuni</i>        | Likely             | 0.9            | Agricultural industry change      | Oral transmission                  |
| <i>Campylobacter jejuni</i>        | Likely             | 0.05           | Agricultural industry change      | Contaminated environment or fomite |
| Cercopithecine herpes virus 1      | Likely             | 1              | Medical industry change           | Direct animal contact              |
| Chikungunya                        | Likely             | 1              | Human demographics and behavior   | Vector-borne                       |
| <i>Clostridium botulinum</i>       | Less likely        | 0.1            | Food industry change              | Airborne transmission              |
| <i>Clostridium botulinum</i>       | Likely             | 0.9            | Food industry change              | Oral transmission                  |
| <i>Coccidioides immitis</i>        | Likely             | 1              | Climate and weather               | Airborne transmission              |
| Cote D'ivoire Ebola                | Likely             | 1              | Land-use change                   | Direct animal contact              |
| <i>Coxiella burnetii</i>           | Likely             | 0.9            | Land-use change                   | Airborne transmission              |
| <i>Coxiella burnetii</i>           | Less likely        | 0.05           | Land-use change                   | Oral transmission                  |
| <i>Coxiella burnetii</i>           | Less likely        | 0.05           | Land-use change                   | Vector-borne                       |
| Crimean-Congo haemorrhagic fever   | Likely             | 1              | War and famine                    | Vector-borne                       |
| <i>Cryptosporidium parvum</i>      | Likely             | 1              | Land-use change                   | Oral transmission                  |
| Dengue                             | Likely             | 1              | War and famine                    | Vector-borne                       |
| Eastern equine encephalitis        | Likely             | 1              | Land-use change                   | Vector-borne                       |
| <i>Echinococcus granulosus</i>     | Likely             | 0.5            | Land-use change                   | Direct animal contact              |
| <i>Echinococcus granulosus</i>     | Likely             | 0.5            | Land-use change                   | Oral transmission                  |
| <i>Ehrlichia canis</i>             | Likely             | 1              | Land-use change                   | Vector-borne                       |
| <i>Ehrlichia chaffeensis</i>       | Likely             | 1              | Land-use change                   | Vector-borne                       |
| <i>Ehrlichia equi</i>              | Likely             | 1              | Land-use change                   | Vector-borne                       |
| <i>Ehrlichia phagocytophila</i>    | Likely             | 1              | Land-use change                   | Vector-borne                       |

(continued)

SUPPLEMENTARY TABLE S1. (CONTINUED)

| <i>Pathogen/disease</i>             | <i>Probability</i> | <i>Weights</i> | <i>Driver</i>                     | <i>Transmission routes</i>         |
|-------------------------------------|--------------------|----------------|-----------------------------------|------------------------------------|
| <i>Ehrlichia sennetsu</i>           | Likely             | 1              | International travel and commerce | Vector-borne                       |
| <i>Enterococcus faecalis</i>        | Likely             | 0.5            | Agricultural industry change      | Direct animal contact              |
| <i>Enterococcus faecalis</i>        | Likely             | 0.5            | Agricultural industry change      | Contaminated environment or fomite |
| <i>Enterococcus faecalis</i>        | Likely             | 0.5            | Agricultural industry change      | Direct animal contact              |
| <i>Enterococcus faecalis</i>        | Likely             | 0.5            | Agricultural industry change      | Contaminated environment or fomite |
| <i>Escherichia coli</i>             | Likely             | 0.9            | Food industry change              | Oral transmission                  |
| <i>Escherichia coli</i>             | Less likely        | 0.1            | Food industry change              | Contaminated environment or fomite |
| European tick-borne encephalitis    | Likely             | 1              | Land-use change                   | Vector-borne                       |
| Far eastern tick-borne encephalitis | Likely             | 1              | Land-use change                   | Vector-borne                       |
| <i>Francisella tularensis</i>       | Likely             | 0.25           | Agricultural industry change      | Direct animal contact              |
| <i>Francisella tularensis</i>       | Likely             | 0.25           | Agricultural industry change      | Airborne transmission              |
| <i>Francisella tularensis</i>       | Likely             | 0.25           | Agricultural industry change      | Oral transmission                  |
| <i>Francisella tularensis</i>       | Likely             | 0.25           | Agricultural industry change      | Vector-borne                       |
| Guama                               | Likely             | 1              | Land-use change                   | Vector-borne                       |
| Guanarito                           | Less likely        | 0.1            | Land-use change                   | Direct animal contact              |
| Guanarito                           | Likely             | 0.9            | Land-use change                   | Airborne transmission              |
| Hantaan                             | Likely             | 1              | Land-use change                   | Airborne transmission              |
| <i>Helicobacter cinaedi</i>         | Less likely        | 0.1            | Human demographics and behavior   | Direct animal contact              |
| <i>Helicobacter cinaedi</i>         | Likely             | 0.9            | Human demographics and behavior   | Oral transmission                  |
| <i>Helicobacter cinaedi</i>         | Likely             | 0.5            | Human demographics and behavior   | Direct animal contact              |
| <i>Helicobacter cinaedi</i>         | Likely             | 0.5            | Human demographics and behavior   | Oral transmission                  |
| Hendra                              | Likely             | 1              | International travel and commerce | Direct animal contact              |
| Hepatitis A                         | Likely             | 1              | International travel and commerce | Oral transmission                  |
| Hepatitis E                         | Likely             | 1              | Other                             | Oral transmission                  |
| <i>Histoplasma capsulatum</i>       | Likely             | 1              | War and famine                    | Airborne transmission              |
| Influenza A virus                   | Likely             | 0.9            | Agricultural industry change      | Direct animal contact              |
| Influenza A virus                   | Less likely        | 0.05           | Agricultural industry change      | Airborne transmission              |
| Influenza A virus                   | Less likely        | 0.05           | Agricultural industry change      | Contaminated environment or fomite |
| Inkoo virus                         | Likely             | 1              | Other                             | Vector-borne                       |
| Jamestown Canyon virus              | Likely             | 1              | Land-use change                   | Vector-borne                       |
| Japanese encephalitis virus         | Likely             | 1              | Agricultural industry change      | Vector-borne                       |
| Junin virus                         | Likely             | 1              | Agricultural industry change      | Airborne transmission              |
| Kunjin virus                        | Likely             | 1              | Land-use change                   | Vector-borne                       |
| Kyasanur forest disease virus       | Likely             | 1              | Land-use change                   | Direct animal contact              |
| LaCrosse virus                      | Likely             | 1              | Land-use change                   | Vector-borne                       |
| Laguna Negra virus                  | Likely             | 1              | Agricultural industry change      | Airborne transmission              |
| Lassa virus                         | Less likely        | 0.1            | International travel and commerce | Direct animal contact              |
| Lassa virus                         | Likely             | 0.9            | International travel and commerce | Airborne transmission              |
| <i>Leishmania donovani</i>          | Likely             | 1              | Land-use change                   | Vector-borne                       |
| <i>Leishmania infantum</i>          | Likely             | 1              | Land-use change                   | Vector-borne                       |
| <i>Leishmania tropica</i>           | Likely             | 1              | War and famine                    | Vector-borne                       |
| <i>Leptospira fainei</i>            | Likely             | 0.5            | Agricultural industry change      | Direct animal contact              |
| <i>Leptospira fainei</i>            | Likely             | 0.5            | Agricultural industry change      | Contaminated environment or fomite |
| <i>Leptospira interrogans</i>       | Less likely        | 0.05           | War and famine                    | Direct animal contact              |
| <i>Leptospira interrogans</i>       | Less likely        | 0.05           | War and famine                    | Oral transmission                  |
| <i>Leptospira interrogans</i>       | Likely             | 0.9            | War and famine                    | Contaminated environment or fomite |
| <i>Leptospira weilii</i>            | Likely             | 0.5            | Land-use change                   | Direct animal contact              |
| <i>Leptospira weilii</i>            | Likely             | 0.5            | Land-use change                   | Contaminated environment or fomite |
| <i>Listeria monocytogenes</i>       | Less likely        | 0.0333333      | Agricultural industry change      | Direct animal contact              |
| <i>Listeria monocytogenes</i>       | Less likely        | 0.0333333      | Agricultural industry change      | Airborne transmission              |
| <i>Listeria monocytogenes</i>       | Likely             | 0.9            | Agricultural industry change      | Oral transmission                  |

(continued)

SUPPLEMENTARY TABLE S1. (CONTINUED)

| <i>Pathogen/disease</i>            | <i>Probability</i> | <i>Weights</i> | <i>Driver</i>                       | <i>Transmission routes</i>         |
|------------------------------------|--------------------|----------------|-------------------------------------|------------------------------------|
| <i>Listeria monocytogenes</i>      | Less likely        | 0.0333333      | Agricultural industry change        | Contaminated environment or fomite |
| <i>Listeria monocytogenes</i>      | Less likely        | 0.0333333      | Medical industry change             | Direct animal contact              |
| <i>Listeria monocytogenes</i>      | Less likely        | 0.0333333      | Medical industry change             | Airborne transmission              |
| <i>Listeria monocytogenes</i>      | Likely             | 0.9            | Medical industry change             | Oral transmission                  |
| <i>Listeria monocytogenes</i>      | Less likely        | 0.0333333      | Medical industry change             | Contaminated environment or fomite |
| Louping ill virus                  | Likely             | 1              | Medical industry change             | Vector-borne                       |
| Machupo virus                      | Likely             | 1              | Agricultural industry change        | Airborne transmission              |
| Marburg virus                      | Likely             | 1              | Medical industry change             | Direct animal contact              |
| Mayaro virus                       | Likely             | 1              | Land-use change                     | Vector-borne                       |
| Menangle virus                     | Likely             | 1              | Agricultural industry change        | Direct animal contact              |
| <i>Metorchis conjunctus</i>        | Likely             | 1              | Agricultural industry change        | Oral transmission                  |
| Monkeypox virus                    | Likely             | 0.9            | Bushmeat                            | Direct animal contact              |
| Monkeypox virus                    | Less likely        | 0.1            | Bushmeat                            | Contaminated environment or fomite |
| Murray Valley encephalitis virus   | Likely             | 1              | Climate and weather                 | Vector-borne                       |
| <i>Mycobacterium marinum</i>       | Likely             | 0.5            | Agricultural industry change        | Direct animal contact              |
| <i>Mycobacterium marinum</i>       | Likely             | 0.5            | Agricultural industry change        | Contaminated environment or fomite |
| <i>Mycobacterium tuberculosis</i>  | Less likely        | 0.1            | War and famine                      | Direct animal contact              |
| <i>Mycobacterium tuberculosis</i>  | Likely             | 0.9            | War and famine                      | Airborne transmission              |
| <i>Neisseria weaveri</i>           | Likely             | 1              | Medical industry change             | Direct animal contact              |
| New variant CJD                    | Likely             | 1              | Agricultural industry change        | Oral transmission                  |
| Nipah virus                        | Likely             | 0.5            | Agricultural industry change        | Direct animal contact              |
| Nipah virus                        | Likely             | 0.5            | Agricultural industry change        | Oral transmission                  |
| Noroviruses                        | Likely             | 1              | Medical industry change             | Oral transmission                  |
| Norwalk virus                      | Less likely        | 0.05           | Agricultural industry change        | Airborne transmission              |
| Norwalk virus                      | Likely             | 0.9            | Agricultural industry change        | Oral transmission                  |
| Norwalk virus                      | Less likely        | 0.05           | Agricultural industry change        | Contaminated environment or fomite |
| O'nyong-nyong virus                | Likely             | 1              | Other                               | Vector-borne                       |
| Ockelbo virus (subtype of Sindbis) | Likely             | 1              | International travel and commerce   | Vector-borne                       |
| Omsk virus                         | Less likely        | 0.05           | International travel and commerce   | Direct animal contact              |
| Omsk virus                         | Likely             | 0.9            | International travel and commerce   | Vector-borne                       |
| Omsk virus                         | Less likely        | 0.05           | International travel and commerce   | Contaminated environment or fomite |
| <i>Orientia tsutsugamushi</i>      | Likely             | 1              | War and famine                      | Vector-borne                       |
| Oropouche virus                    | Likely             | 1              | Land-use change                     | Vector-borne                       |
| Orungo virus                       | Likely             | 1              | Other                               | Vector-borne                       |
| <i>Penicillium marneffeii</i>      | Likely             | 1              | International travel and commerce   | Airborne transmission              |
| Puumala virus                      | Likely             | 1              | Land-use change                     | Airborne transmission              |
| Rabies virus                       | Likely             | 0.9            | Land-use change                     | Direct animal contact              |
| Rabies virus                       | Less likely        | 0.1            | Land-use change                     | Airborne transmission              |
| Reston Ebola virus                 | Likely             | 1              | Medical industry change             | Direct animal contact              |
| <i>Rickettsia africae</i>          | Likely             | 1              | International travel and commerce   | Vector-borne                       |
| <i>Rickettsia akari</i>            | Less likely        | 0.1            | Human demographics and behavior     | Direct animal contact              |
| <i>Rickettsia akari</i>            | Likely             | 0.9            | Human demographics and behavior     | Vector-borne                       |
| <i>Rickettsia felis</i>            | Likely             | 1              | Medical industry change             | Vector-borne                       |
| <i>Rickettsia helvetica</i>        | Likely             | 1              | Land-use change                     | Vector-borne                       |
| <i>Rickettsia honei</i>            | Likely             | 1              | International travel and commerce   | Vector-borne                       |
| <i>Rickettsia japonica</i>         | Likely             | 1              | Medical industry change             | Vector-borne                       |
| <i>Rickettsia mongolotimonae</i>   | Likely             | 1              | International travel and commerce   | Vector-borne                       |
| <i>Rickettsia prowazekii</i>       | Less likely        | 0.1            | War and famine                      | Airborne transmission              |
| <i>Rickettsia prowazekii</i>       | Likely             | 0.9            | War and famine                      | Vector-borne                       |
| <i>Rickettsia quintana</i>         | Less likely        | 0.1            | Breakdown of public health measures | Airborne transmission              |
| <i>Rickettsia quintana</i>         | Likely             | 0.9            | Breakdown of public health measures | Vector-borne                       |
| <i>Rickettsia rickettsii</i>       | Likely             | 1              | Human demographics and behavior     | Vector-borne                       |
| <i>Rickettsia slovaca</i>          | Likely             | 1              | Land-use change                     | Vector-borne                       |
| <i>Rickettsia typhi</i>            | Likely             | 1              | International travel and commerce   | Vector-borne                       |

(continued)

SUPPLEMENTARY TABLE S1. (CONTINUED)

| <i>Pathogen/disease</i>                 | <i>Probability</i> | <i>Weights</i> | <i>Driver</i>                          | <i>Transmission routes</i>            |
|-----------------------------------------|--------------------|----------------|----------------------------------------|---------------------------------------|
| Rift Valley fever virus                 | Likely             | 0.9            | Land-use change                        | Direct animal contact                 |
| Rift Valley fever virus                 | Less likely        | 0.05           | Land-use change                        | Airborne transmission                 |
| Rift Valley fever virus                 | Less likely        | 0.05           | Land-use change                        | Vector-borne                          |
| Rocio virus                             | Likely             | 1              | Other                                  | Vector-borne                          |
| Ross River virus                        | Likely             | 1              | Land-use change                        | Vector-borne                          |
| Rotavirus A                             | Less likely        | 0.1            | Medical industry change                | Airborne transmission                 |
| Rotavirus A                             | Likely             | 0.9            | Medical industry change                | Oral transmission                     |
| Rotavirus B                             | Less likely        | 0.1            | Medical industry change                | Airborne transmission                 |
| Rotavirus B                             | Likely             | 0.9            | Medical industry change                | Oral transmission                     |
| Rotavirus C                             | Less likely        | 0.1            | Medical industry change                | Airborne transmission                 |
| Rotavirus C                             | Likely             | 0.9            | Medical industry change                | Oral transmission                     |
| Sabia virus                             | Likely             | 1              | Medical industry change                | Airborne transmission                 |
| <i>Salmonella enteritidis</i>           | Likely             | 0.45           | Food industry change                   | Direct animal contact                 |
| <i>Salmonella enteritidis</i>           | Likely             | 0.45           | Food industry change                   | Oral transmission                     |
| <i>Salmonella enteritidis</i>           | Less likely        | 0.1            | Food industry change                   | Contaminated<br>environment or fomite |
| <i>Salmonella typhimurium</i>           | Likely             | 1              | Agricultural industry change           | Oral transmission                     |
| Sandfly fever Naples virus              | Likely             | 1              | War and famine                         | Vector-borne                          |
| SARS virus                              | Likely             | 0.9            | Bushmeat                               | Direct animal contact                 |
| SARS virus                              | Less likely        | 0.1            | Bushmeat                               | Airborne transmission                 |
| <i>Schistosoma japonicum</i>            | Likely             | 1              | War and famine                         | Contaminated<br>environment or fomite |
| <i>Schistosoma mansoni</i>              | Likely             | 1              | International travel and commerce      | Contaminated<br>environment or fomite |
| Seoul virus                             | Likely             | 1              | Land-use change                        | Airborne transmission                 |
| Sin Nombre virus                        | Likely             | 1              | Land-use change                        | Airborne transmission                 |
| Sindbis virus                           | Likely             | 1              | Climate and weather                    | Vector-borne                          |
| St. Louis encephalitis virus            | Likely             | 1              | Climate and weather                    | Vector-borne                          |
| <i>Streptococcus iniae</i>              | Likely             | 1              | Agricultural industry change           | Direct animal contact                 |
| Sudan Ebola virus                       | Likely             | 1              | Bushmeat                               | Direct animal contact                 |
| <i>Taenia solium</i>                    | Likely             | 1              | International travel and commerce      | Oral transmission                     |
| Tahyna virus                            | Likely             | 1              | Other                                  | Vector-borne                          |
| <i>Trichinella spiralis</i>             | Likely             | 1              | Breakdown of public<br>health measures | Oral transmission                     |
| <i>Trypanosoma brucei</i>               | Likely             | 1              | Breakdown of public<br>health measures | Vector-borne                          |
| <i>Trypanosoma cruzi</i>                | Likely             | 1              | Land-use change                        | Vector-borne                          |
| Venezuelan equine<br>encephalitis virus | Less likely        | 0.1            | Agricultural industry change           | Airborne transmission                 |
| Venezuelan equine<br>encephalitis virus | Likely             | 0.9            | Agricultural industry change           | Vector-borne                          |
| Venezuelan equine<br>encephalitis virus | Less likely        | 0.1            | Medical industry change                | Airborne transmission                 |
| Venezuelan equine<br>encephalitis virus | Likely             | 0.9            | Medical industry change                | Vector-borne                          |
| <i>Vibrio damsela</i>                   | Likely             | 0.1            | Climate and weather                    | Direct animal contact                 |
| <i>Vibrio damsela</i>                   | Likely             | 0.9            | Climate and weather                    | Contaminated<br>environment or fomite |
| <i>Vibrio fluvialis</i>                 | Likely             | 1              | Climate and weather                    | Contaminated<br>environment or fomite |
| <i>Vibrio fluvialis</i>                 | Likely             | 1              | Climate and weather                    | Oral transmission                     |
| <i>Vibrio hollisae</i>                  | Likely             | 1              | Climate and weather                    | Oral transmission                     |
| <i>Vibrio mimicus</i>                   | Likely             | 1              | Climate and weather                    | Oral transmission                     |
| <i>Vibrio parahaemolyticus</i>          | Likely             | 0.1            | Climate and weather                    | Contaminated<br>environment or fomite |
| <i>Vibrio parahaemolyticus</i>          | Likely             | 0.9            | Climate and weather                    | Oral transmission                     |
| <i>Vibrio vulnificus</i>                | Likely             | 0.9            | Agricultural industry change           | Oral transmission                     |
| <i>Vibrio vulnificus</i>                | Less likely        | 0.1            | Agricultural industry change           | Contaminated<br>environment or fomite |
| Wesselsbron virus                       | Likely             | 1              | International travel and commerce      | Vector-borne                          |
| West Nile virus                         | Likely             | 1              | International travel and commerce      | Vector-borne                          |
| Western equine<br>encephalitis virus    | Likely             | 1              | Land-use change                        | Vector-borne                          |

(continued)

SUPPLEMENTARY TABLE S1. (CONTINUED)

| <i>Pathogen/disease</i>        | <i>Probability</i> | <i>Weights</i> | <i>Driver</i>                       | <i>Transmission routes</i> |
|--------------------------------|--------------------|----------------|-------------------------------------|----------------------------|
| Whitewater Arroyo virus        | Likely             | 1              | Land-use change                     | Airborne transmission      |
| Yellow fever virus             | Likely             | 1              | Breakdown of public health measures | Vector-borne               |
| <i>Yersinia enterocolitica</i> | Likely             | 1              | International travel and commerce   | Oral transmission          |
| <i>Yersinia pestis</i>         | Less likely        | 0.05           | Land-use change                     | Direct animal contact      |
| <i>Yersinia pestis</i>         | Less likely        | 0.05           | Land-use change                     | Airborne transmission      |
| <i>Yersinia pestis</i>         | Likely             | 0.9            | Land-use change                     | Vector-borne               |
| Zaire Ebola virus              | Likely             | 1              | Bushmeat                            | Direct animal contact      |
| Zika virus                     | Likely             | 1              | Climate and weather                 | Vector-borne               |
| Zinga virus                    | Likely             | 1              | Land-use change                     | Vector-borne               |
